# Supplementary material for: Neurovascular coupling on trial: How the number of trials completed impacts the accuracy and precision of temporally derived neurovascular coupling estimates
Source: PubMed Central journal article supplement (PMC9274868; doi:10.1177/0271678x221084400), 2022-02-25
Supplement: sj-pdf-4-jcb-10.1177_0271678X221084400.pdf [file sj-pdf-4-jcb-10.1177_0271678X221084400.pdf]

**Supplemental Table 1:** Physiological data during a “Where’s Waldo?” paradigm in 60 individuals (30 females / 30 males). Numerous individuals completed repeated assessments/follow-ups, which produced a total of 160 unique data points. Data were produced from the number of trials completed which ranged from one to eight.

| <b>Variable</b>                 | <b>One</b>  | <b>Two</b>  | <b>Three</b> | <b>Four</b> | <b>Five</b> | <b>Six</b>  | <b>Seven</b> | <b>Eight</b> |
|---------------------------------|-------------|-------------|--------------|-------------|-------------|-------------|--------------|--------------|
| P <sub>ET</sub> CO <sub>2</sub> | 38.0 ± 2.7  | 38.2 ± 2.6  | 38.2 ± 2.6   | 38.2 ± 2.6  | 38.2 ± 2.6  | 38.2 ± 2.6  | 38.2 ± 2.6   | 38.2 ± 2.6   |
| Respiratory Rate                | 14.7 ± 3.3  | 14.7 ± 3.0  | 14.7 ± 2.8   | 14.7 ± 2.8  | 14.7 ± 2.7  | 14.7 ± 2.7  | 14.7 ± 2.6   | 14.7 ± 2.6   |
| Mean Arterial Pressure          | 90.9 ± 10.2 | 90.4 ± 10.2 | 90.3 ± 10.1  | 90.2 ± 10.0 | 90.1 ± 10.0 | 90.1 ± 10.0 | 90.1 ± 9.9   | 90.2 ± 9.9   |
| Heart Rate                      | 67.2 ± 10.7 | 67.8 ± 10.6 | 68.1 ± 10.5  | 68.3 ± 10.5 | 68.5 ± 10.5 | 68.7 ± 10.5 | 68.8 ± 10.5  | 69.0 ± 10.5  |

Data are displayed as mean ± standard deviation. Partial pressure end-tidal values of carbon dioxide (P<sub>ET</sub>CO<sub>2</sub>).

**Supplemental Table 2:** Physiological data during a “Where’s Waldo?” paradigm in 11 individuals (3 females / 8 males) at seven time points across a single day. Data were produced from the number of trials completed which ranged from one to eight.

| Variable                        | Time Point | One         | Two         | Three       | Four        | Five        | Six         | Seven       | Eight       |
|---------------------------------|------------|-------------|-------------|-------------|-------------|-------------|-------------|-------------|-------------|
| P <sub>ET</sub> CO <sub>2</sub> | 08:00      | 39.1 ± 1.8  | 39.3 ± 1.9  | 39.4 ± 1.7  | 39.4 ± 1.7  | 39.4 ± 1.6  | 39.3 ± 1.5  | 39.4 ± 1.5  | 39.3 ± 1.5  |
| P <sub>ET</sub> CO <sub>2</sub> | 09:30      | 38.6 ± 1.7  | 38.8 ± 1.3  | 38.7 ± 1.5  | 38.7 ± 1.4  | 38.5 ± 1.5  | 38.5 ± 1.5  | 38.4 ± 1.6  | 38.4 ± 1.5  |
| P <sub>ET</sub> CO <sub>2</sub> | 10:30      | 37.8 ± 2.7  | 37.8 ± 2.5  | 37.9 ± 2.5  | 37.9 ± 2.2  | 38.0 ± 2.2  | 37.9 ± 2.3  | 37.9 ± 2.3  | 37.9 ± 2.3  |
| P <sub>ET</sub> CO <sub>2</sub> | 11:30      | 36.8 ± 2.5  | 37.1 ± 2.5  | 37.2 ± 2.4  | 37.2 ± 2.4  | 37.2 ± 2.6  | 37.1 ± 2.6  | 37.1 ± 2.6  | 37.1 ± 2.6  |
| P <sub>ET</sub> CO <sub>2</sub> | 13:30      | 39.5 ± 2.0  | 39.7 ± 2.1  | 39.8 ± 2.1  | 39.8 ± 2.0  | 39.8 ± 1.9  | 39.7 ± 1.9  | 39.7 ± 1.8  | 39.6 ± 1.8  |
| P <sub>ET</sub> CO <sub>2</sub> | 15:30      | 39.0 ± 2.3  | 39.1 ± 2.6  | 39.1 ± 2.4  | 39.1 ± 2.4  | 39.1 ± 2.3  | 39.1 ± 2.4  | 39.0 ± 2.4  | 39.1 ± 2.4  |
| P <sub>ET</sub> CO <sub>2</sub> | 17:30      | 38.2 ± 2.3  | 38.3 ± 2.2  | 38.4 ± 2.0  | 38.4 ± 2.0  | 38.4 ± 1.9  | 38.3 ± 1.9  | 38.3 ± 2.0  | 38.2 ± 2.0  |
| Respiratory Rate                | 08:00      | 15.1 ± 3.1  | 13.8 ± 1.7  | 13.7 ± 1.5  | 13.7 ± 1.5  | 13.7 ± 1.4  | 13.6 ± 1.5  | 13.6 ± 1.5  | 13.6 ± 1.4  |
| Respiratory Rate                | 09:30      | 14.1 ± 2.8  | 14.1 ± 2.4  | 14.4 ± 2.1  | 14.4 ± 2.2  | 14.5 ± 2    | 14.5 ± 1.9  | 14.5 ± 1.8  | 14.4 ± 1.8  |
| Respiratory Rate                | 10:30      | 14.4 ± 2.4  | 14.8 ± 2.4  | 14.8 ± 1.8  | 14.8 ± 1.7  | 15.0 ± 1.7  | 15.0 ± 1.6  | 15.0 ± 1.6  | 14.9 ± 1.5  |
| Respiratory Rate                | 11:30      | 14.6 ± 2.4  | 15.0 ± 2.3  | 14.9 ± 2.0  | 14.8 ± 2.0  | 14.7 ± 2.0  | 14.8 ± 2.0  | 14.7 ± 2.0  | 14.8 ± 2.1  |
| Respiratory Rate                | 13:30      | 15.0 ± 2.8  | 15.0 ± 2.4  | 15.2 ± 2.2  | 15.4 ± 2.0  | 15.4 ± 1.9  | 15.6 ± 1.8  | 15.6 ± 1.7  | 15.5 ± 1.7  |
| Respiratory Rate                | 15:30      | 15.4 ± 2.8  | 15.5 ± 2.7  | 15.4 ± 2.7  | 15.5 ± 2.7  | 15.4 ± 2.5  | 15.4 ± 2.5  | 15.5 ± 2.5  | 15.4 ± 2.4  |
| Respiratory Rate                | 17:30      | 15.3 ± 2.5  | 15.3 ± 2.4  | 15.1 ± 2.1  | 15.1 ± 2.1  | 15.1 ± 2.1  | 15.1 ± 2.0  | 15.1 ± 2.0  | 15.2 ± 1.9  |
| Mean Arterial Pressure          | 08:00      | 90.1 ± 11.6 | 88.5 ± 11.6 | 87.3 ± 11.1 | 87.3 ± 10.9 | 87.0 ± 10.8 | 86.9 ± 10.5 | 86.9 ± 10.4 | 86.8 ± 10.3 |
| Mean Arterial Pressure          | 09:30      | 91.2 ± 9.3  | 90.9 ± 8.7  | 90.8 ± 8.3  | 90.6 ± 8.3  | 90.2 ± 8.5  | 90.1 ± 8.6  | 90.1 ± 8.7  | 90.2 ± 8.8  |
| Mean Arterial Pressure          | 10:30      | 97.0 ± 8.7  | 96.8 ± 9.1  | 96.9 ± 8.7  | 96.9 ± 9.0  | 97.0 ± 9.1  | 96.8 ± 9.1  | 96.7 ± 9.2  | 96.6 ± 9.3  |
| Mean Arterial Pressure          | 11:30      | 94.9 ± 6.1  | 96.0 ± 6.4  | 96.4 ± 6.8  | 96.2 ± 7.0  | 95.8 ± 7.6  | 96.0 ± 7.9  | 96.0 ± 8.1  | 96.2 ± 8.4  |
| Mean Arterial Pressure          | 13:30      | 92.5 ± 6.4  | 91.7 ± 8.7  | 91.8 ± 8.3  | 91.6 ± 8.2  | 91.7 ± 7.9  | 91.5 ± 7.7  | 91.5 ± 7.7  | 91.6 ± 7.7  |
| Mean Arterial Pressure          | 15:30      | 93.2 ± 5.0  | 92.9 ± 5.2  | 92.7 ± 5.7  | 92.7 ± 5.6  | 92.7 ± 6.0  | 93.0 ± 5.9  | 93.0 ± 5.9  | 93.0 ± 5.9  |
| Mean Arterial Pressure          | 17:30      | 94.2 ± 8.5  | 94.3 ± 8.0  | 94.3 ± 8.3  | 94.6 ± 8.3  | 94.9 ± 8.5  | 95.1 ± 8.5  | 95.3 ± 8.5  | 95.5 ± 8.4  |
| Heart Rate                      | 08:00      | 68.4 ± 7.4  | 68.6 ± 7.3  | 69.0 ± 7.4  | 69.1 ± 7.5  | 69.3 ± 7.8  | 69.2 ± 7.7  | 69.2 ± 7.8  | 69.2 ± 7.7  |
| Heart Rate                      | 09:30      | 61.3 ± 7.9  | 62.7 ± 8.2  | 63.2 ± 8.2  | 63.5 ± 8.3  | 63.9 ± 8.4  | 64.2 ± 8.3  | 64.4 ± 8.2  | 64.6 ± 8.2  |
| Heart Rate                      | 10:30      | 62.5 ± 10.9 | 63.4 ± 10.8 | 63.8 ± 10.6 | 63.9 ± 10.7 | 64 ± 10.8   | 64.3 ± 11.0 | 64.4 ± 11.0 | 64.7 ± 11.0 |
| Heart Rate                      | 11:30      | 63.1 ± 12.2 | 64.2 ± 11.8 | 64.5 ± 11.4 | 64.6 ± 11.3 | 64.9 ± 11.2 | 64.9 ± 11.2 | 65.2 ± 11.2 | 65.3 ± 11.2 |
| Heart Rate                      | 13:30      | 72.3 ± 8.1  | 73.0 ± 8.4  | 73.4 ± 8.6  | 73.5 ± 8.5  | 73.5 ± 8.6  | 73.6 ± 8.7  | 73.7 ± 8.7  | 73.9 ± 8.8  |
| Heart Rate                      | 15:30      | 66.6 ± 11.0 | 67.3 ± 11   | 67.4 ± 10.8 | 67.8 ± 10.9 | 67.8 ± 10.9 | 68.0 ± 10.8 | 68.1 ± 10.6 | 68.1 ± 10.6 |
| Heart Rate                      | 17:30      | 64.2 ± 10.3 | 64.5 ± 10.4 | 64.7 ± 10.4 | 65.0 ± 10.6 | 65.1 ± 10.5 | 65.3 ± 10.1 | 65.6 ± 9.9  | 65.7 ± 10.0 |

Data are displayed as mean ± standard deviation. Partial pressure end-tidal values of carbon dioxide (P<sub>ET</sub>CO<sub>2</sub>).

**Supplemental Table 3:** Physiological data during a “*Where’s Waldo?*” paradigm in 17 individuals (3 females / 14 males) at three time points on separate days. Data were produced from the number of trials completed which ranged from one to eight.

| <b>Variable</b>                 | <b>Time Point</b> | <b>One</b>  | <b>Two</b> | <b>Three</b> | <b>Four</b> | <b>Five</b> | <b>Six</b> | <b>Seven</b> | <b>Eight</b> |
|---------------------------------|-------------------|-------------|------------|--------------|-------------|-------------|------------|--------------|--------------|
| P <sub>ET</sub> CO <sub>2</sub> | Day One           | 38.5 ± 2.6  | 38.6 ± 2.9 | 38.7 ± 2.9   | 38.6 ± 3.2  | 38.6 ± 3.2  | 38.5 ± 3.2 | 38.5 ± 3.3   | 38.5 ± 3.3   |
| P <sub>ET</sub> CO <sub>2</sub> | Day Two           | 38.7 ± 2.4  | 38.7 ± 2.5 | 38.5 ± 2.6   | 38.5 ± 2.8  | 38.5 ± 2.7  | 38.5 ± 2.8 | 38.5 ± 2.8   | 38.5 ± 2.8   |
| P <sub>ET</sub> CO <sub>2</sub> | Day Three         | 38.5 ± 2.5  | 38.4 ± 2.3 | 38.4 ± 2.4   | 38.4 ± 2.5  | 38.3 ± 2.4  | 38.3 ± 2.4 | 38.2 ± 2.4   | 38.2 ± 2.3   |
| Respiratory Rate                | Day One           | 14.6 ± 2.2  | 14.3 ± 1.9 | 14.4 ± 1.9   | 14.3 ± 1.8  | 14.4 ± 1.8  | 14.4 ± 1.9 | 14.3 ± 1.8   | 14.3 ± 1.8   |
| Respiratory Rate                | Day Two           | 15.4 ± 3.5  | 15.1 ± 3.3 | 15.1 ± 3.4   | 14.8 ± 3.4  | 14.8 ± 3.4  | 14.7 ± 3.3 | 14.7 ± 3.3   | 14.7 ± 3.3   |
| Respiratory Rate                | Day Three         | 15.2 ± 2.9  | 15.2 ± 2.3 | 15.2 ± 2.1   | 15.2 ± 2.0  | 15.3 ± 2.0  | 15.2 ± 1.9 | 15.3 ± 1.9   | 15.2 ± 1.9   |
| Mean Arterial Pressure          | Day One           | 89.6 ± 10.2 | 88.7 ± 9.9 | 88.1 ± 9.8   | 88.1 ± 9.5  | 87.9 ± 9.5  | 87.9 ± 9.3 | 87.9 ± 9.3   | 87.8 ± 9.2   |
| Mean Arterial Pressure          | Day Two           | 88.2 ± 8.1  | 87.7 ± 8.0 | 87.8 ± 8.3   | 87.6 ± 8.0  | 87.6 ± 7.6  | 87.7 ± 7.6 | 87.8 ± 7.3   | 88.1 ± 7.3   |
| Mean Arterial Pressure          | Day Three         | 91.9 ± 8.4  | 91.2 ± 7.7 | 90.7 ± 8.1   | 90.4 ± 8.2  | 90.2 ± 7.9  | 90.1 ± 7.7 | 90.0 ± 7.7   | 90.0 ± 7.7   |
| Heart Rate                      | Day One           | 67.1 ± 8.9  | 67.4 ± 8.6 | 67.8 ± 8.7   | 67.7 ± 8.5  | 67.9 ± 8.6  | 67.9 ± 8.7 | 68.0 ± 8.7   | 68.1 ± 8.7   |
| Heart Rate                      | Day Two           | 67.4 ± 9.0  | 67.3 ± 8.9 | 67.4 ± 8.8   | 67.4 ± 8.6  | 67.7 ± 8.7  | 67.8 ± 8.8 | 68.3 ± 8.8   | 68.4 ± 8.8   |
| Heart Rate                      | Day Three         | 66.4 ± 6.4  | 66.9 ± 6.7 | 67.1 ± 6.9   | 67.0 ± 6.8  | 67.0 ± 6.8  | 67.0 ± 6.8 | 67.0 ± 6.8   | 67.1 ± 6.8   |

Data are displayed as mean ± standard deviation. Partial pressure end-tidal values of carbon dioxide (P<sub>ET</sub>CO<sub>2</sub>).

**Supplemental Table 4:** Neurovascular coupling metrics derived during a “*Where’s Waldo?*” paradigm in 60 individuals (30 females / 30 males) in the posterior cerebral artery (PCA) and middle cerebral artery (MCA). Numerous of individuals completed repeated assessments, which produced a total of 160 unique data time points. Data were produced from the number of trials completed which ranged from one to eight.

| <b>Variable</b>      | <b>One</b>   | <b>Two</b>   | <b>Three</b> | <b>Four</b>  | <b>Five</b>  | <b>Six</b>   | <b>Seven</b> | <b>Eight</b> |
|----------------------|--------------|--------------|--------------|--------------|--------------|--------------|--------------|--------------|
| PCA Baseline         | 33.8 ± 6.4   | 33.8 ± 6.2   | 33.8 ± 6.2   | 33.8 ± 6.2   | 33.8 ± 6.2   | 33.7 ± 6.3   | 33.7 ± 6.3   | 33.7 ± 6.3   |
| PCA Peak             | 45.5 ± 8.5   | 44.7 ± 8.2   | 44.3 ± 8.1   | 44.1 ± 8.0   | 43.8 ± 7.9   | 43.6 ± 7.8   | 43.4 ± 7.7   | 43.3 ± 7.7   |
| PCA Percent Increase | 35.0 ± 11.1  | 32.4 ± 9.7   | 31.3 ± 9.0   | 30.6 ± 9.0   | 29.9 ± 8.7   | 29.6 ± 8.9   | 29.1 ± 8.6   | 28.9 ± 8.6   |
| PCA AUC30            | 210.2 ± 87.5 | 208.2 ± 80.4 | 207.1 ± 76.2 | 205.6 ± 73.7 | 204.1 ± 71.2 | 204.7 ± 71.6 | 203.1 ± 69.3 | 202.6 ± 69.2 |
| PCA Time To Peak     | 16.9 ± 7.2   | 17.3 ± 6.5   | 17.7 ± 6.2   | 17.6 ± 6.1   | 17.8 ± 5.9   | 17.6 ± 6.2   | 17.6 ± 6.1   | 18.0 ± 6.2   |
| MCA Baseline         | 58.4 ± 9.9   | 58.4 ± 9.8   | 58.3 ± 10    | 58.2 ± 10.1  | 58.2 ± 10.1  | 58.0 ± 10.1  | 57.9 ± 10.1  | 57.9 ± 10.1  |
| MCA Peak             | 67.9 ± 11.5  | 65.9 ± 10.8  | 65.0 ± 10.6  | 64.6 ± 10.7  | 64.2 ± 10.5  | 63.9 ± 10.5  | 63.6 ± 10.6  | 63.5 ± 10.6  |
| MCA Percent Increase | 16.7 ± 10.1  | 13.3 ± 7.1   | 11.8 ± 6.4   | 11.3 ± 6.1   | 10.7 ± 5.6   | 10.6 ± 5.6   | 10.2 ± 5.2   | 9.9 ± 5.1    |
| MCA AUC30            | 97.3 ± 97.3  | 86.8 ± 72.8  | 81.0 ± 67.3  | 78.5 ± 66.6  | 77.2 ± 64.7  | 79.2 ± 65.1  | 76.6 ± 60.4  | 76.4 ± 60.6  |
| MCA Time To Peak     | 13.1 ± 9.1   | 13.5 ± 8.7   | 13.9 ± 9.3   | 13.6 ± 9.2   | 13.9 ± 9.4   | 14.0 ± 9.4   | 14.9 ± 9.7   | 13.3 ± 9.3   |

Data are displayed as mean ± standard deviation. The outcome metrics of interest within the PCA and MCA included: baseline velocity (cm/s), peak velocity (cm/s), relative percent (%) increase in velocity from baseline to peak, total activation/area-under-the-curve during the first 30-seconds of task engagement (AUC30) (cm/s/30s), and time-to-peak velocity during task engagement (s).

**Supplemental Table 5:** Neurovascular coupling metrics derived during a “Where’s Waldo?” paradigm in 11 individuals (3 females / 8 males) in the posterior cerebral artery (PCA) and middle cerebral artery (MCA) at seven time points across a single day. Data were produced from the number of trials completed which ranged from one to eight.

| Variable             | Time Point | One          | Two          | Three        | Four         | Five         | Six          | Seven        | Eight        |
|----------------------|------------|--------------|--------------|--------------|--------------|--------------|--------------|--------------|--------------|
| PCA Baseline         | 08:00      | 34.1 ± 7.0   | 33.6 ± 6.9   | 33.4 ± 7.3   | 33.5 ± 7.3   | 33.6 ± 7.3   | 33.5 ± 7.3   | 33.4 ± 7.3   | 33.5 ± 7.3   |
| PCA Baseline         | 09:30      | 33.3 ± 6.7   | 33.4 ± 6.9   | 33.7 ± 6.8   | 33.7 ± 6.8   | 33.7 ± 6.7   | 33.5 ± 6.5   | 33.5 ± 6.5   | 33.4 ± 6.4   |
| PCA Baseline         | 10:30      | 33.2 ± 5.5   | 33.4 ± 6.3   | 33.5 ± 6.6   | 33.6 ± 6.5   | 33.6 ± 6.6   | 33.7 ± 6.6   | 33.7 ± 6.6   | 33.7 ± 6.7   |
| PCA Baseline         | 11:30      | 33.3 ± 5.7   | 33.6 ± 5.5   | 33.6 ± 5.6   | 33.7 ± 6.0   | 33.6 ± 5.9   | 33.5 ± 6.0   | 33.5 ± 5.9   | 33.6 ± 5.8   |
| PCA Baseline         | 13:30      | 34.1 ± 6.7   | 33.9 ± 6.5   | 34.1 ± 6.3   | 34.2 ± 6.3   | 34.3 ± 6.4   | 34.3 ± 6.3   | 34.2 ± 6.4   | 34.1 ± 6.3   |
| PCA Baseline         | 15:30      | 32.9 ± 6.5   | 33.0 ± 6.5   | 32.9 ± 6.3   | 32.9 ± 6.2   | 32.9 ± 6.2   | 32.9 ± 6.4   | 32.8 ± 6.3   | 32.8 ± 6.3   |
| PCA Baseline         | 17:30      | 33.4 ± 6.0   | 32.6 ± 5.0   | 32.8 ± 5.2   | 32.8 ± 5.3   | 32.8 ± 5.3   | 32.6 ± 5.3   | 32.6 ± 5.4   | 32.6 ± 5.5   |
| PCA Peak             | 08:00      | 45.4 ± 7.6   | 44.8 ± 7.6   | 44.3 ± 7.9   | 43.9 ± 7.7   | 43.6 ± 7.8   | 43.3 ± 7.6   | 43.3 ± 7.5   | 43.1 ± 7.5   |
| PCA Peak             | 09:30      | 45.9 ± 9.8   | 44.8 ± 9.0   | 44.5 ± 8.6   | 44.8 ± 8.4   | 44.5 ± 8.7   | 44.2 ± 8.4   | 44.0 ± 7.9   | 43.6 ± 7.8   |
| PCA Peak             | 10:30      | 45.2 ± 7.8   | 44.9 ± 8.2   | 44.3 ± 8.2   | 44.2 ± 8.3   | 43.9 ± 8.0   | 43.7 ± 7.8   | 43.6 ± 7.7   | 43.5 ± 7.6   |
| PCA Peak             | 11:30      | 45.2 ± 8.2   | 45.1 ± 8.0   | 44.8 ± 7.8   | 44.4 ± 7.7   | 44.2 ± 7.3   | 44.1 ± 7.0   | 43.8 ± 6.9   | 43.7 ± 6.9   |
| PCA Peak             | 13:30      | 45.7 ± 9.0   | 45.2 ± 8.4   | 45.0 ± 8.3   | 44.7 ± 8.1   | 44.4 ± 8.0   | 44.3 ± 7.8   | 44.0 ± 7.8   | 44.0 ± 7.8   |
| PCA Peak             | 15:30      | 43.8 ± 8.8   | 43.1 ± 8.1   | 43.1 ± 7.7   | 42.8 ± 7.4   | 42.6 ± 7.5   | 42.4 ± 7.3   | 42.3 ± 7.6   | 42.2 ± 7.4   |
| PCA Peak             | 17:30      | 44.6 ± 7.5   | 43.1 ± 6.8   | 42.9 ± 6.7   | 42.6 ± 6.6   | 42.5 ± 6.7   | 42.5 ± 6.7   | 42.1 ± 6.8   | 42.2 ± 6.8   |
| PCA Percent Increase | 08:00      | 34.2 ± 7.7   | 34.0 ± 7.9   | 33.7 ± 8.0   | 32.4 ± 8.0   | 30.9 ± 7.7   | 30.4 ± 8.1   | 30.7 ± 8.2   | 29.9 ± 8.3   |
| PCA Percent Increase | 09:30      | 38.0 ± 9.1   | 34.4 ± 7.9   | 32.5 ± 7.4   | 33.3 ± 8.2   | 32.4 ± 7.4   | 32.3 ± 7.6   | 31.8 ± 7.3   | 31.3 ± 6.8   |
| PCA Percent Increase | 10:30      | 36.0 ± 9.4   | 34.9 ± 8.5   | 32.6 ± 6.4   | 31.8 ± 6.0   | 31.0 ± 6.7   | 30.3 ± 6.8   | 30.0 ± 7.3   | 29.8 ± 7.4   |
| PCA Percent Increase | 11:30      | 35.8 ± 13.6  | 34.4 ± 9.0   | 33.6 ± 9.1   | 32.1 ± 9.6   | 32.0 ± 8.8   | 32.0 ± 8.5   | 31.4 ± 8.0   | 30.4 ± 7.8   |
| PCA Percent Increase | 13:30      | 34.4 ± 7.9   | 33.8 ± 6.8   | 32.1 ± 6.7   | 30.9 ± 7.4   | 30.0 ± 7.7   | 29.5 ± 7.8   | 29.1 ± 7.5   | 29.3 ± 8.0   |
| PCA Percent Increase | 15:30      | 33.7 ± 10.7  | 31.3 ± 11.6  | 31.7 ± 9.6   | 30.8 ± 9.1   | 30.0 ± 8.5   | 29.6 ± 8.7   | 29.4 ± 8.0   | 28.8 ± 7.6   |
| PCA Percent Increase | 17:30      | 33.8 ± 8.6   | 32.3 ± 6.5   | 31.3 ± 6.5   | 30.1 ± 7.1   | 29.9 ± 7.5   | 30.4 ± 7.8   | 29.6 ± 7.4   | 29.9 ± 6.9   |
| PCA AUC30            | 08:00      | 211.6 ± 55.7 | 221.3 ± 60.0 | 225.9 ± 46.6 | 219.0 ± 45.6 | 215.8 ± 46.0 | 212.0 ± 42.1 | 213.1 ± 40.3 | 209.9 ± 40.4 |
| PCA AUC30            | 09:30      | 224.1 ± 49.2 | 224.1 ± 64.2 | 216.0 ± 62.4 | 217.7 ± 58.0 | 216.7 ± 60.2 | 217.8 ± 61.0 | 216.3 ± 57.0 | 216.4 ± 55.0 |
| PCA AUC30            | 10:30      | 240.9 ± 91.0 | 231.6 ± 65.9 | 217.0 ± 56.2 | 215.8 ± 53.0 | 211.2 ± 51.6 | 209.7 ± 52.3 | 208.0 ± 53.2 | 207.8 ± 51.2 |
| PCA AUC30            | 11:30      | 214.0 ± 90.6 | 220.4 ± 69.3 | 221.9 ± 67.2 | 216.2 ± 63.6 | 217.6 ± 59.1 | 222.9 ± 53.4 | 224.2 ± 54.2 | 219.5 ± 56.7 |
| PCA AUC30            | 13:30      | 207.6 ± 65.7 | 220.2 ± 52.0 | 215.0 ± 53.2 | 209.5 ± 54.0 | 207.8 ± 55.1 | 207.0 ± 56.4 | 207.8 ± 54.3 | 209 ± 55.1   |
| PCA AUC30            | 15:30      | 196.9 ± 69.4 | 200.2 ± 73.6 | 203.4 ± 61.8 | 200.6 ± 55.3 | 199.0 ± 52.6 | 198.7 ± 52.4 | 202.2 ± 52.5 | 200.1 ± 50.9 |
| PCA AUC30            | 17:30      | 183.6 ± 70.9 | 210 ± 62.5   | 206.8 ± 59.2 | 204.2 ± 63.0 | 202.9 ± 62.3 | 207.3 ± 61.2 | 204.1 ± 57.1 | 203.3 ± 56.6 |
| PCA Time to Peak     | 08:00      | 19.8 ± 6.6   | 17.9 ± 6.4   | 17.5 ± 5.7   | 16.0 ± 5.0   | 17.2 ± 4.4   | 16.7 ± 4.8   | 16.9 ± 4.6   | 18.5 ± 6.5   |
| PCA Time to Peak     | 09:30      | 19.5 ± 6.6   | 18.8 ± 6.3   | 18.2 ± 4.1   | 19.9 ± 5.6   | 19.5 ± 5.2   | 19.9 ± 6.1   | 19.2 ± 5.6   | 19.2 ± 5.3   |
| PCA Time to Peak     | 10:30      | 17.9 ± 6.5   | 18.6 ± 5.0   | 17.5 ± 3.5   | 16.6 ± 2.8   | 17.3 ± 4.6   | 17.7 ± 3.4   | 17.6 ± 4.8   | 19.0 ± 4.1   |
| PCA Time to Peak     | 11:30      | 16.7 ± 7.1   | 18.7 ± 5.7   | 16.1 ± 4.8   | 17.8 ± 4.5   | 18.2 ± 5.6   | 16.7 ± 6.3   | 19.4 ± 6.2   | 19.3 ± 5.9   |
| PCA Time to Peak     | 13:30      | 18.7 ± 6.5   | 18.8 ± 5.6   | 16.8 ± 4.2   | 16.9 ± 4.1   | 16.6 ± 4.0   | 16.8 ± 4.0   | 18.0 ± 5.0   | 18.2 ± 4.7   |
| PCA Time to Peak     | 15:30      | 14.6 ± 4.8   | 17.9 ± 5.8   | 18.8 ± 5.1   | 19.2 ± 5.6   | 18.3 ± 5.1   | 17.6 ± 5.4   | 17.6 ± 5.1   | 17.6 ± 5.5   |
| PCA Time to Peak     | 17:30      | 16.0 ± 7.7   | 18.9 ± 6.9   | 19.6 ± 5.6   | 19.9 ± 6.0   | 19.8 ± 6.0   | 20.1 ± 6.5   | 19.7 ± 6.1   | 18.8 ± 6.2   |

|                      |       |               |              |             |             |             |             |             |             |
|----------------------|-------|---------------|--------------|-------------|-------------|-------------|-------------|-------------|-------------|
| MCA Baseline         | 08:00 | 61.5 ± 9.9    | 60.4 ± 9.3   | 60 ± 10.1   | 60.1 ± 10.2 | 60.1 ± 10.4 | 59.9 ± 10.5 | 59.9 ± 10.5 | 59.9 ± 10.5 |
| MCA Baseline         | 09:30 | 59.1 ± 9.6    | 59.6 ± 9.6   | 59.9 ± 9.3  | 59.8 ± 9.2  | 59.6 ± 8.9  | 59.4 ± 8.9  | 59.3 ± 8.9  | 59.3 ± 8.9  |
| MCA Baseline         | 10:30 | 59.3 ± 6.5    | 59.5 ± 7.4   | 60.1 ± 8.0  | 60.1 ± 8.2  | 60.1 ± 8.4  | 60.1 ± 8.6  | 60.2 ± 8.6  | 60.2 ± 8.7  |
| MCA Baseline         | 11:30 | 59.2 ± 8.6    | 59.6 ± 8.8   | 59.8 ± 9.7  | 59.8 ± 10.2 | 59.6 ± 10.1 | 59.6 ± 10.0 | 59.5 ± 9.8  | 59.4 ± 9.5  |
| MCA Baseline         | 13:30 | 61.7 ± 9.9    | 61.6 ± 9.0   | 61.9 ± 9.3  | 62.3 ± 9.3  | 62.6 ± 9.8  | 62.5 ± 9.9  | 62.2 ± 9.7  | 62.1 ± 9.8  |
| MCA Baseline         | 15:30 | 60 ± 9.7      | 59.0 ± 8.8   | 58.9 ± 8.3  | 58.8 ± 8.3  | 59.0 ± 8.3  | 59.0 ± 8.3  | 58.8 ± 8.2  | 59.0 ± 8.1  |
| MCA Baseline         | 17:30 | 61.8 ± 8.1    | 59.9 ± 7.2   | 59.9 ± 6.7  | 59.8 ± 7.3  | 59.6 ± 7.6  | 59.2 ± 7.6  | 59.0 ± 7.8  | 58.9 ± 7.9  |
| MCA Peak             | 08:00 | 69.2 ± 9.9    | 67.1 ± 9.5   | 66.2 ± 9.8  | 65.4 ± 9.9  | 65.2 ± 9.8  | 65.1 ± 10   | 64.9 ± 10   | 64.6 ± 10.1 |
| MCA Peak             | 09:30 | 68.1 ± 9.8    | 66.4 ± 9.5   | 66.0 ± 9.0  | 65.7 ± 8.7  | 65.1 ± 8.9  | 64.7 ± 8.8  | 64.4 ± 8.9  | 64.0 ± 8.7  |
| MCA Peak             | 10:30 | 68.7 ± 8.5    | 67.6 ± 8.6   | 66.5 ± 8.4  | 65.8 ± 8.7  | 65.2 ± 8.2  | 65.0 ± 7.9  | 64.8 ± 8.1  | 64.8 ± 8.2  |
| MCA Peak             | 11:30 | 67.6 ± 10.6   | 66.8 ± 10.7  | 65.5 ± 10.9 | 65.1 ± 10.4 | 64.9 ± 9.9  | 64.9 ± 9.5  | 64.8 ± 9.5  | 64.7 ± 9.5  |
| MCA Peak             | 13:30 | 70.8 ± 10.7   | 68.6 ± 9.9   | 68.1 ± 10.1 | 68.0 ± 10.1 | 67.5 ± 9.9  | 67.3 ± 9.7  | 67.1 ± 9.8  | 67.0 ± 9.8  |
| MCA Peak             | 15:30 | 66.9 ± 8.9    | 64.7 ± 7.9   | 64.4 ± 7.4  | 64.3 ± 7.2  | 63.9 ± 7.2  | 63.9 ± 7.2  | 63.6 ± 7.3  | 63.5 ± 7.2  |
| MCA Peak             | 17:30 | 68.7 ± 9.6    | 66.1 ± 7.9   | 65.4 ± 7.5  | 65.1 ± 8.0  | 64.8 ± 7.6  | 64.6 ± 7.8  | 64.2 ± 8.4  | 64.0 ± 8.8  |
| MCA Percent Increase | 08:00 | 13.0 ± 5.1    | 11.4 ± 4.6   | 10.8 ± 5.1  | 9.2 ± 4.3   | 8.9 ± 4.8   | 9.1 ± 4.3   | 8.9 ± 4.2   | 8.3 ± 4.3   |
| MCA Percent Increase | 09:30 | 16.1 ± 7.5    | 11.9 ± 6.3   | 10.7 ± 5.1  | 10.4 ± 5.8  | 9.5 ± 5.0   | 9.2 ± 4.9   | 8.9 ± 4.5   | 8.3 ± 4.8   |
| MCA Percent Increase | 10:30 | 16.0 ± 7.5    | 13.8 ± 4.2   | 10.7 ± 3.1  | 9.5 ± 2.9   | 8.7 ± 3.4   | 8.5 ± 4.3   | 8.0 ± 4.0   | 7.9 ± 4.0   |
| MCA Percent Increase | 11:30 | 14.2 ± 8.8    | 12.0 ± 6.1   | 9.6 ± 4.3   | 9.1 ± 5.1   | 9.1 ± 4.6   | 9.4 ± 5.3   | 9.4 ± 5.2   | 9.2 ± 4.7   |
| MCA Percent Increase | 13:30 | 15.2 ± 9.4    | 11.8 ± 7.1   | 10.1 ± 5.5  | 9.3 ± 5.1   | 8.1 ± 3.5   | 8.1 ± 3.5   | 8.0 ± 3.1   | 8.1 ± 3.1   |
| MCA Percent Increase | 15:30 | 12.5 ± 9.4    | 10.2 ± 6.8   | 10.0 ± 6.8  | 9.9 ± 7.0   | 8.9 ± 6.3   | 8.9 ± 6.0   | 8.5 ± 5.4   | 8.1 ± 5.3   |
| MCA Percent Increase | 17:30 | 11.3 ± 6.6    | 10.6 ± 4.1   | 9.1 ± 2.8   | 8.8 ± 2.4   | 8.8 ± 3.1   | 9.3 ± 3.1   | 8.9 ± 3.1   | 8.6 ± 2.8   |
| MCA AUC30            | 08:00 | 63.7 ± 62.2   | 78.4 ± 74.5  | 81.4 ± 65.5 | 69.4 ± 65.1 | 67.0 ± 64.4 | 70.2 ± 56.2 | 69.6 ± 51.0 | 65.8 ± 48.9 |
| MCA AUC30            | 09:30 | 103.9 ± 59.8  | 93.7 ± 78.1  | 72.8 ± 58.4 | 64.8 ± 60.2 | 59.0 ± 62.4 | 60.3 ± 60.1 | 57.7 ± 51.3 | 55.0 ± 49.1 |
| MCA AUC30            | 10:30 | 129.6 ± 115.3 | 114.9 ± 65.0 | 80.4 ± 50.5 | 74.3 ± 46.4 | 69.8 ± 50.5 | 66.2 ± 53.9 | 63.8 ± 51.9 | 64.3 ± 47.5 |
| MCA AUC30            | 11:30 | 95.3 ± 95.9   | 74.2 ± 59.0  | 63.2 ± 58.3 | 58.1 ± 59.4 | 57.6 ± 57.8 | 63.6 ± 57.5 | 67.5 ± 59.0 | 69.5 ± 64.4 |
| MCA AUC30            | 13:30 | 63.1 ± 83.0   | 66.4 ± 60.3  | 59.3 ± 45.9 | 55.2 ± 42.3 | 48.2 ± 34.8 | 50.8 ± 38.9 | 54.1 ± 42.5 | 55.2 ± 42.2 |
| MCA AUC30            | 15:30 | 67.6 ± 79.3   | 73.6 ± 71.9  | 68.4 ± 62.0 | 61.9 ± 58.5 | 55.8 ± 50.8 | 56.4 ± 51.1 | 55.9 ± 53.0 | 50.4 ± 47.7 |
| MCA AUC30            | 17:30 | 46.1 ± 76.2   | 54.7 ± 37.1  | 43.7 ± 40.2 | 42.5 ± 46.0 | 45.7 ± 46.1 | 56.2 ± 45.5 | 54.1 ± 44.7 | 54.9 ± 46.0 |
| MCA Time to Peak     | 08:00 | 13.8 ± 8.5    | 12.0 ± 7.7   | 14.1 ± 8.2  | 11.2 ± 8.0  | 9.7 ± 6.2   | 12.6 ± 7.5  | 15.8 ± 7.6  | 10.9 ± 7.7  |
| MCA Time to Peak     | 09:30 | 15.6 ± 11.0   | 13.1 ± 8.6   | 11.3 ± 10.4 | 12.2 ± 10.0 | 12.5 ± 8.3  | 13.7 ± 9.7  | 11.4 ± 8.8  | 9.7 ± 7.1   |
| MCA Time to Peak     | 10:30 | 12.3 ± 11.0   | 16.2 ± 8.8   | 14.4 ± 9.1  | 17.4 ± 8.2  | 18.6 ± 8.9  | 14.7 ± 9.9  | 15.2 ± 9.5  | 16.7 ± 9.7  |
| MCA Time to Peak     | 11:30 | 11.8 ± 8.1    | 15.8 ± 9.2   | 9.6 ± 8.5   | 10.6 ± 7.9  | 9.4 ± 8.2   | 8.3 ± 6.9   | 10.5 ± 9.5  | 8.8 ± 7.1   |
| MCA Time to Peak     | 13:30 | 12.0 ± 11.3   | 14.9 ± 10.2  | 12.8 ± 10.1 | 9.6 ± 7.0   | 11.8 ± 8.4  | 10.6 ± 9.4  | 11.1 ± 8.7  | 8.7 ± 7.0   |
| MCA Time to Peak     | 15:30 | 12.4 ± 8.2    | 12.9 ± 7.7   | 14.3 ± 7.6  | 15.2 ± 7.7  | 12.9 ± 7.9  | 11.6 ± 7.5  | 14.0 ± 8.6  | 12.9 ± 9.4  |
| MCA Time to Peak     | 17:30 | 10.6 ± 8.3    | 15.2 ± 8.3   | 19.5 ± 10.0 | 13.8 ± 11.1 | 16.1 ± 11.3 | 16.9 ± 9.9  | 17.1 ± 10.0 | 15.2 ± 8.8  |

Data are displayed as mean ± standard deviation. The outcome metrics of interest within the PCA and MCA included: baseline velocity (cm/s), peak velocity (cm/s), relative percent (%) increase in velocity from baseline to peak, total activation/area-under-the-curve during the first 30-seconds of task engagement (AUC30) (cm/s/30s), and time-to-peak velocity during task engagement (s).

**Supplemental Table 6:** Neurovascular coupling metrics derived during a “Where’s Waldo?” paradigm in 17 individuals (3 females / 14 males) in the posterior cerebral artery (PCA) and middle cerebral artery (MCA) at three time points on separate days. Data were produced from the number of trials completed which ranged from one to eight.

| Variable             | Time Point | One          | Two          | Three        | Four         | Five         | Six          | Seven        | Eight        |
|----------------------|------------|--------------|--------------|--------------|--------------|--------------|--------------|--------------|--------------|
| PCA Baseline         | Day One    | 33.2 ± 4.9   | 33.1 ± 4.9   | 33.1 ± 5.3   | 33.1 ± 5.3   | 33.1 ± 5.3   | 33.0 ± 5.3   | 33.0 ± 5.2   | 33.0 ± 5.2   |
| PCA Baseline         | Day Two    | 33.2 ± 7.2   | 32.8 ± 6.7   | 32.4 ± 6.7   | 32.2 ± 6.7   | 32.2 ± 6.7   | 32.2 ± 6.8   | 32.2 ± 6.6   | 32.2 ± 6.7   |
| PCA Baseline         | Day Three  | 34.5 ± 7.7   | 34.4 ± 7.3   | 34.5 ± 7.2   | 34.4 ± 7.2   | 34.4 ± 7.3   | 34.3 ± 7.5   | 34.4 ± 7.7   | 34.5 ± 7.8   |
| PCA Peak             | Day One    | 44.7 ± 7.0   | 43.7 ± 6.4   | 43.2 ± 6.8   | 43 ± 6.6     | 42.7 ± 6.6   | 42.5 ± 6.6   | 42.4 ± 6.4   | 42.3 ± 6.5   |
| PCA Peak             | Day Two    | 43.2 ± 8.3   | 42.4 ± 8.4   | 41.9 ± 8.1   | 41.8 ± 8.0   | 41.5 ± 7.8   | 41.4 ± 7.7   | 41.2 ± 7.6   | 41.1 ± 7.5   |
| PCA Peak             | Day Three  | 46.8 ± 9.8   | 45.8 ± 9.8   | 45.1 ± 10    | 44.8 ± 9.9   | 44.5 ± 9.9   | 44.3 ± 9.7   | 44.1 ± 9.7   | 44.1 ± 9.6   |
| PCA Percent Increase | Day One    | 34.6 ± 9.9   | 32.1 ± 9.6   | 30.9 ± 9.3   | 30.4 ± 8.5   | 29.3 ± 8.3   | 28.9 ± 8.8   | 28.8 ± 8.5   | 28.5 ± 8.6   |
| PCA Percent Increase | Day Two    | 30.8 ± 9.4   | 29.3 ± 8.6   | 29.7 ± 7.8   | 30.4 ± 7.9   | 29.7 ± 7.4   | 29.3 ± 7.8   | 28.6 ± 7.3   | 28.5 ± 7.5   |
| PCA Percent Increase | Day Three  | 36.4 ± 9.6   | 32.9 ± 6.6   | 30.8 ± 6.4   | 29.7 ± 6.1   | 29.3 ± 6.8   | 29.1 ± 7.5   | 28.5 ± 7.9   | 28.0 ± 8.2   |
| PCA AUC30            | Day One    | 209.9 ± 73.3 | 202.4 ± 76.4 | 203.8 ± 68.4 | 203.7 ± 63.6 | 201.2 ± 65.3 | 199.8 ± 65.3 | 199.8 ± 64.5 | 199.6 ± 64.5 |
| PCA AUC30            | Day Two    | 169.8 ± 80.2 | 171.3 ± 71.9 | 187.2 ± 58.8 | 194.0 ± 55.8 | 196.6 ± 49.6 | 195.0 ± 49.8 | 194.9 ± 50.2 | 195.8 ± 51.1 |
| PCA AUC30            | Day Three  | 222.7 ± 62.9 | 215.4 ± 65.9 | 209.3 ± 77.0 | 207.8 ± 76.9 | 206.9 ± 74.6 | 204.5 ± 72.4 | 200.4 ± 67.1 | 198.1 ± 67.2 |
| PCA Time To Peak     | Day One    | 16.8 ± 7.0   | 15.8 ± 7.2   | 18.7 ± 7.5   | 17.1 ± 7.5   | 16.3 ± 6.8   | 17.1 ± 7.6   | 16.2 ± 6.8   | 19.6 ± 7.1   |
| PCA Time To Peak     | Day Two    | 15.4 ± 7.4   | 16.6 ± 6.5   | 18.6 ± 7.0   | 18.1 ± 6.6   | 19.1 ± 5.1   | 17.6 ± 6.5   | 15.0 ± 5.5   | 16.2 ± 6.5   |
| PCA Time To Peak     | Day Three  | 18.6 ± 7.6   | 18.2 ± 7.7   | 17.3 ± 8.5   | 18.2 ± 8.8   | 19.4 ± 7.7   | 19.0 ± 7.6   | 18.3 ± 7.1   | 16.8 ± 7.5   |
| MCA Baseline         | Day One    | 60.5 ± 8.2   | 59.3 ± 7.4   | 59.0 ± 7.7   | 58.9 ± 8.2   | 58.9 ± 8.3   | 58.7 ± 8.3   | 58.7 ± 8.1   | 58.6 ± 8.0   |
| MCA Baseline         | Day Two    | 60.0 ± 9.7   | 59.0 ± 8.8   | 58.9 ± 8.3   | 58.8 ± 8.3   | 59.0 ± 8.3   | 59.0 ± 8.3   | 58.8 ± 8.2   | 59.0 ± 8.1   |
| MCA Baseline         | Day Three  | 61.8 ± 8.1   | 59.9 ± 7.2   | 59.9 ± 6.7   | 59.8 ± 7.3   | 59.6 ± 7.6   | 59.2 ± 7.6   | 59.0 ± 7.8   | 58.9 ± 7.9   |
| MCA Peak             | Day One    | 69.2 ± 9.9   | 67.1 ± 9.5   | 66.2 ± 9.8   | 65.4 ± 9.9   | 65.2 ± 9.8   | 65.1 ± 10.0  | 64.9 ± 10.0  | 64.6 ± 10.1  |
| MCA Peak             | Day Two    | 68.1 ± 9.8   | 66.4 ± 9.5   | 66.0 ± 9.0   | 65.7 ± 8.7   | 65.1 ± 8.9   | 64.7 ± 8.8   | 64.4 ± 8.9   | 64.0 ± 8.7   |
| MCA Peak             | Day Three  | 68.7 ± 9.6   | 66.1 ± 7.9   | 65.4 ± 7.5   | 65.1 ± 8.0   | 64.8 ± 7.6   | 64.6 ± 7.8   | 64.2 ± 8.4   | 64.0 ± 8.8   |
| MCA Percent Increase | Day One    | 13.0 ± 5.1   | 11.4 ± 4.6   | 10.8 ± 5.1   | 9.2 ± 4.3    | 8.9 ± 4.8    | 9.1 ± 4.3    | 8.9 ± 4.2    | 8.3 ± 4.3    |
| MCA Percent Increase | Day Two    | 12.5 ± 9.4   | 10.2 ± 6.8   | 10.0 ± 6.8   | 9.9 ± 7.0    | 8.9 ± 6.3    | 8.9 ± 6.0    | 8.5 ± 5.4    | 8.1 ± 5.3    |
| MCA Percent Increase | Day Three  | 11.3 ± 6.6   | 10.6 ± 4.1   | 9.1 ± 2.8    | 8.8 ± 2.4    | 8.8 ± 3.1    | 9.3 ± 3.1    | 8.9 ± 3.1    | 8.6 ± 2.8    |
| MCA AUC30            | Day One    | 63.7 ± 62.2  | 78.4 ± 74.5  | 81.4 ± 65.5  | 69.4 ± 65.1  | 67.0 ± 64.4  | 70.2 ± 56.2  | 69.6 ± 51.0  | 65.8 ± 48.9  |
| MCA AUC30            | Day Two    | 67.6 ± 79.3  | 73.6 ± 71.9  | 68.4 ± 62.0  | 61.9 ± 58.5  | 55.8 ± 50.8  | 56.4 ± 51.1  | 55.9 ± 53.0  | 50.4 ± 47.7  |
| MCA AUC30            | Day Three  | 46.1 ± 76.2  | 54.7 ± 37.1  | 43.7 ± 40.2  | 42.5 ± 46.0  | 45.7 ± 46.1  | 56.2 ± 45.5  | 54.1 ± 44.7  | 54.9 ± 46.0  |
| MCA Time To Peak     | Day One    | 13.8 ± 8.5   | 12.0 ± 7.7   | 14.1 ± 8.2   | 11.2 ± 8.0   | 9.7 ± 6.2    | 12.6 ± 7.5   | 15.8 ± 7.6   | 10.9 ± 7.7   |
| MCA Time To Peak     | Day Two    | 12.4 ± 8.2   | 12.9 ± 7.7   | 14.3 ± 7.6   | 15.2 ± 7.7   | 12.9 ± 7.9   | 11.6 ± 7.5   | 14.0 ± 8.6   | 12.9 ± 9.4   |
| MCA Time To Peak     | Day Three  | 10.6 ± 8.3   | 15.2 ± 8.3   | 19.5 ± 10.0  | 13.8 ± 11.1  | 16.1 ± 11.3  | 16.9 ± 9.9   | 17.1 ± 10.0  | 15.2 ± 8.8   |

Data are displayed as mean ± standard deviation. The outcome metrics of interest within the PCA and MCA included: baseline velocity (cm/s), peak velocity (cm/s), relative percent (%) increase in velocity from baseline to peak, total activation/area-under-the-curve during the first 30-seconds of task engagement (AUC30) (cm/s/30s), and time-to-peak velocity during task engagement (s).
