# Supplementary material for: Neurovascular coupling on trial: How the number of trials completed impacts the accuracy and precision of temporally derived neurovascular coupling estimates
Source: PubMed Central journal article supplement (PMC9274868; doi:10.1177/0271678x221084400), 2022-02-25
Supplement: sj-pdf-5-jcb-10.1177_0271678X221084400.pdf [file sj-pdf-5-jcb-10.1177_0271678X221084400.pdf]

1 **Supplemental Figure 1:** Bland-Altman plots with 95% limits of agreement demonstrating the  
2 *concurrent validity* of neurovascular coupling metrics within the middle cerebral artery (MCA)  
3 derived from one to seven trials compared to the “*reference-standard*” eight trials. A total of 160  
4 time points were drawn from 60 participants (30 females / 30 males). It is important to note the  
5 increasing trials represent the average from the given numbers of trials completed, which would  
6 contain the previous trial(s). It should be highlighted the time-to-peak measures displayed wide  
7 variance across all trials and therefore this metric should be interpreted with caution. The outcome  
8 metrics of interest within the middle cerebral artery (MCA) included: baseline MCA velocity  
9 (cm/s), peak MCA velocity (cm/s), relative percent (%) increase in MCA velocity from baseline  
10 to peak, MCA total activation/area-under-the-curve during the first 30-seconds of task engagement  
11 (AUC30) (cm/s/30s), and time-to-peak MCA velocity during task engagement (s).

12  
13 **Supplemental Figure 2:** Intraclass correlation coefficients (ICC), adjusted coefficient of  
14 determination ( $r^2$ ) values, and coefficient of variation (COV) metrics demonstrating the *concurrent*  
15 *validity* of neurovascular coupling metrics within the middle cerebral artery (MCA) derived from  
16 one to seven trials compared to the “*reference-standard*” eight trials. It is important to note the  
17 increasing trials represent the average from the given numbers of trials completed, which would  
18 contain the previous trial(s). Thresholds for the ICC were set at: <0.50 (poor; red), 0.50 – 0.75  
19 (moderate; orange), 0.75 – 0.90 (good; yellow), and >0.90 (excellent; green). Thresholds for the  
20 adjusted  $r^2$  metrics were set at: <0.10 (negligible; red), 0.10 – 0.30 (small; orange), 0.30 – 0.50  
21 (moderate; yellow), 0.50 – 0.80 (large; blue), and 0.80 – 1.00 (very large; green). Thresholds for  
22 the CoV were: >20% (unacceptable; red), 10 – 20% (acceptable: orange), 5 – 10% (good; yellow),  
23 and <5% (excellent; green). The outcome metrics of interest within the middle cerebral artery

24 (MCA) included: baseline MCA velocity (cm/s), peak MCA velocity (cm/s), relative percent (%)  
25 increase in MCA velocity from baseline to peak, MCA total activation/area-under-the-curve  
26 during the first 30-seconds of task engagement (AUC30) (cm/s/30s), and time-to-peak MCA  
27 velocity during task engagement (s).

28

29 **Supplemental Figure 3:** Intraclass correlation coefficients (ICC) and coefficient of variation  
30 (COV) metrics demonstrating the *within-day reliability* of neurovascular coupling metrics within  
31 the middle cerebral artery (MCA) derived from one to eight trials. It is important to note the  
32 increasing trials represent the average from the given numbers of trials completed, which would  
33 contain the previous trial(s). Thresholds for the ICC were set at: <0.50 (poor; red), 0.50 – 0.75  
34 (moderate; orange), 0.75 – 0.90 (good; yellow), and >0.90 (excellent; green). Thresholds for the  
35 CoV were: >20% (unacceptable; red), 10 – 20% (acceptable: orange), 5 – 10% (good; yellow),  
36 and <5% (excellent; green). The outcome metrics of interest within the middle cerebral artery  
37 (MCA) included: baseline MCA velocity (cm/s), peak MCA velocity (cm/s), relative percent (%)  
38 increase in MCA velocity from baseline to peak, MCA total activation/area-under-the-curve  
39 during the first 30-seconds of task engagement (AUC30) (cm/s/30s), and time-to-peak MCA  
40 velocity during task engagement (s).

41

42 **Supplemental Figure 4:** Intraclass correlation coefficients (ICC) and coefficient of variation  
43 (COV) metrics demonstrating the *between-day reliability* of neurovascular coupling metrics within  
44 the middle cerebral artery (MCA) derived from one to eight trials. It is important to note the  
45 increasing trials represent the average from the given numbers of trials completed, which would  
46 contain the previous trial(s). Thresholds for the ICC were set at: <0.50 (poor; red), 0.50 – 0.75

47 (moderate; orange), 0.75 – 0.90 (good; yellow), and >0.90 (excellent; green). Thresholds for the  
48 CoV were: >20% (unacceptable; red), 10 – 20% (acceptable: orange), 5 – 10% (good; yellow),  
49 and <5% (excellent; green). The outcome metrics of interest within the middle cerebral artery  
50 (MCA) included: baseline MCA velocity (cm/s), peak MCA velocity (cm/s), relative percent (%)  
51 increase in MCA velocity from baseline to peak, MCA total activation/area-under-the-curve  
52 during the first 30-seconds of task engagement (AUC30) (cm/s/30s), and time-to-peak MCA  
53 velocity during task engagement (s).

54
